# Supplementary material for: Characterizing serum metabolic alterations of Alzheimer's disease and intervention of Shengmai-San by ultra-performance liquid chromatography/electrospray ionization quadruple time-of-flight mass spectrometry
Source: Royal Society of Chemistry journal article supplement (doi:10.1039/c7fo00154a), 2017-01-01
Supplement: c7fo00154a1.pdf [file c7fo00154a1.pdf]

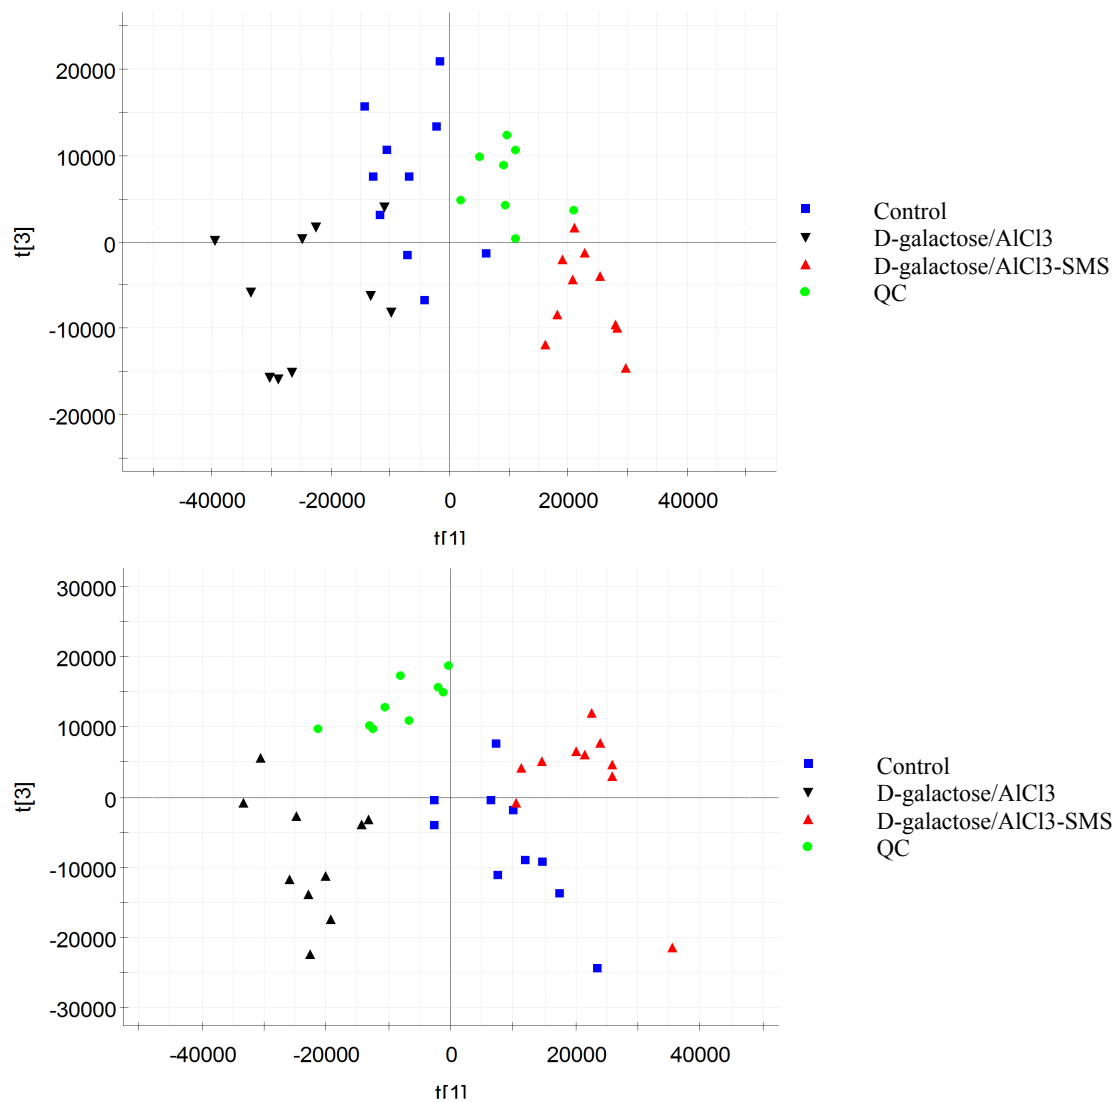

Fig. S1 Score plot of serum profiles of control, D-galactose/AICl3, D-galactose/AICl3-SMS and QC groups by principal component analysis .  
A: scanned in positive ion mode B: scanned in negative ion mode.

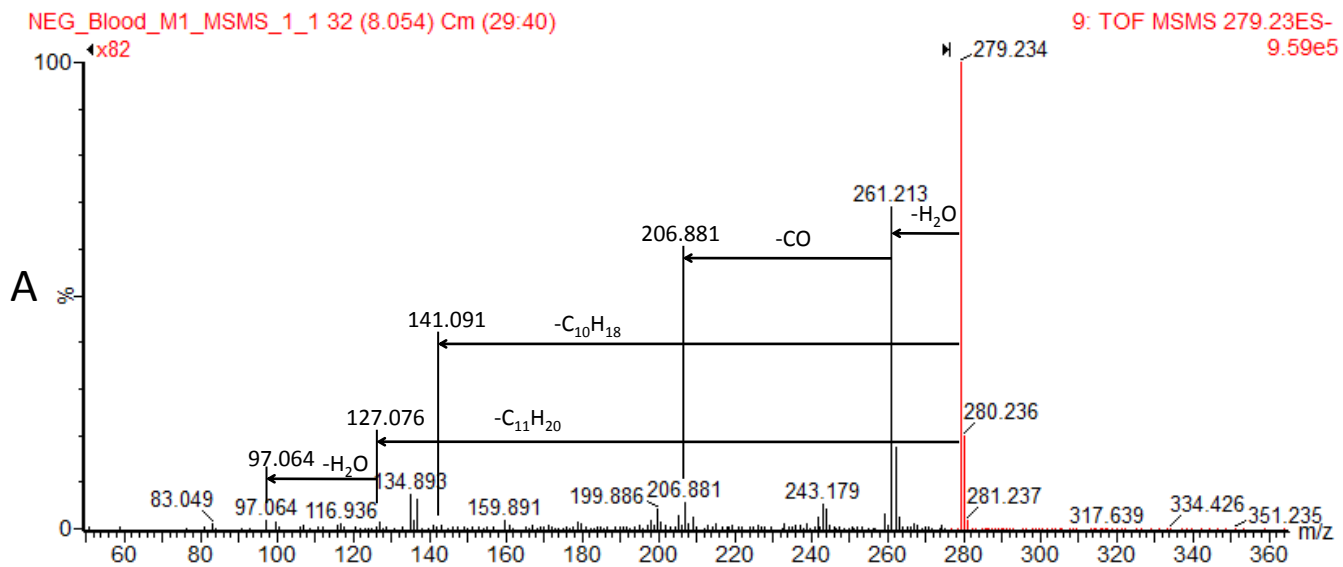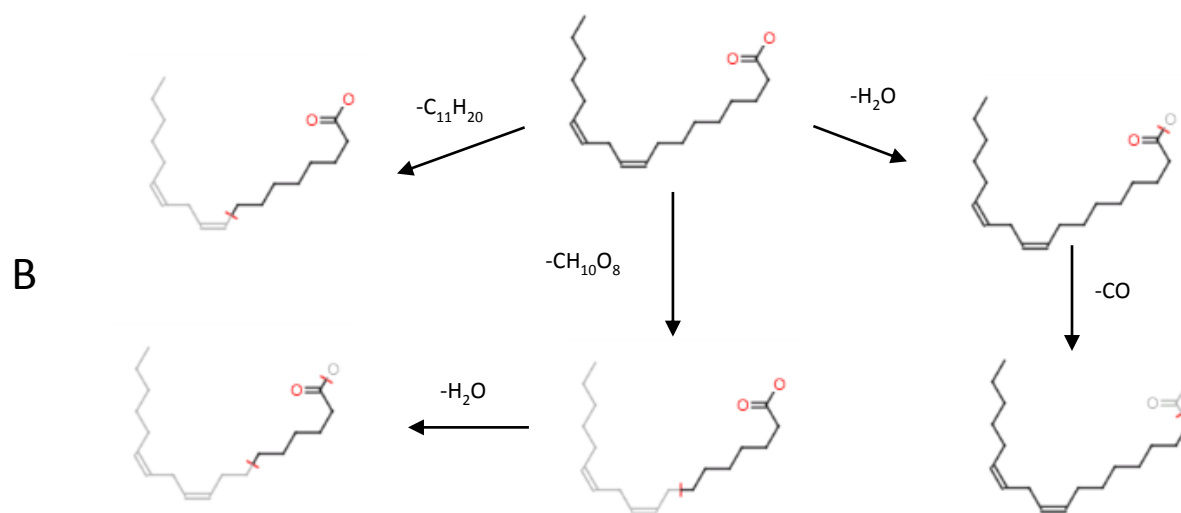

Fig. S2 Typical ion (Linoleic acid) MS/MS information and fragment pathway scanned in negative ion mode.
