# Supplementary material for: Characterizing serum metabolic alterations of Alzheimer's disease and intervention of Shengmai-San by ultra-performance liquid chromatography/electrospray ionization quadruple time-of-flight mass spectrometry
Source: Royal Society of Chemistry journal article supplement (doi:10.1039/c7fo00154a), 2017-01-01
Supplement: c7fo00154a2.pdf [file c7fo00154a2.pdf]

**Table S1.** Identified ion information of serum biomarkers in AD model rats.

| No. | Rt min | M/Z Determined | M/Z Calculated | Actual_M | Scan Mode        | Proposed Composition                                          | Proposed Identity     | MS/MS fragment ion (m/z)                                                                                                                                                                                                                                                                                                                                                                                                                      | Change Trend |
|-----|--------|----------------|----------------|----------|------------------|---------------------------------------------------------------|-----------------------|-----------------------------------------------------------------------------------------------------------------------------------------------------------------------------------------------------------------------------------------------------------------------------------------------------------------------------------------------------------------------------------------------------------------------------------------------|--------------|
| 1   | 0.56   | 145.0975       | 145.0977       | 146.1055 | ESI <sup>-</sup> | C <sub>6</sub> H <sub>14</sub> N <sub>2</sub> O <sub>2</sub>  | Lysine                | 145.0975[M-H] <sup>-</sup> ,128.0319[M-H <sub>3</sub> N-H] <sup>-</sup> ,127.0497[M-H <sub>2</sub> O-H] <sup>-</sup> ,177.0614[M+H] <sup>+</sup> ,160.0358[M-H <sub>3</sub> N+H] <sup>+</sup> ,117.0300[M-CH <sub>4</sub> N <sub>2</sub> O+H] <sup>+</sup> ,91.0508[M-C <sub>2</sub> H <sub>2</sub> N <sub>2</sub> O <sub>2</sub> +H] <sup>+</sup>                                                                                            | ↑            |
| 2   | 0.57   | 177.0614       | 177.0624       | 176.0546 | ESI <sup>+</sup> | C <sub>4</sub> H <sub>8</sub> N <sub>4</sub> O <sub>4</sub>   | Allantoic acid        | 296.0859[M-H] <sup>-</sup> ,217.0600[M-CH <sub>5</sub> O-H] <sup>-</sup> ,115.0395[M-C <sub>5</sub> H <sub>5</sub> N <sub>5</sub> -H] <sup>-</sup> ,111.0320[M-C <sub>5</sub> H <sub>7</sub> N <sub>4</sub> O-H] <sup>-</sup> ,243.0615[M+H] <sup>+</sup> ,228.0508[M-HN+H] <sup>+</sup> ,153.0426[M-C <sub>2</sub> H <sub>4</sub> NO <sub>3</sub> +H] <sup>+</sup> ,110.0116[M-C <sub>5</sub> H <sub>9</sub> O <sub>4</sub> +H] <sup>+</sup> | ↑            |
| 3   | 0.63   | 296.0859       | 250.094        | 251.1018 | ESI <sup>-</sup> | C <sub>10</sub> H <sub>13</sub> N <sub>5</sub> O <sub>3</sub> | 5'-Deoxyadenosine     | 189.1255[M+H] <sup>+</sup> ,128.0712[M-C <sub>2</sub> H <sub>5</sub> NO+H] <sup>+</sup> ,111.0684[M-C <sub>2</sub> H <sub>6</sub> NO <sub>2</sub> +H] <sup>+</sup> ,87.0320[M-C <sub>5</sub> H <sub>10</sub> NO+H] <sup>+</sup>                                                                                                                                                                                                               | ↑            |
| 4   | 0.68   | 243.0615       | 243.0617       | 244.0695 | ESI <sup>-</sup> | C <sub>9</sub> H <sub>12</sub> N <sub>2</sub> O <sub>6</sub>  | Uridine               | 258.1104[M+H] <sup>+</sup> ,213.0766[M-C <sub>2</sub> H <sub>5</sub> O+H] <sup>+</sup> ,154.0031[M-C <sub>5</sub> H <sub>14</sub> NO+H] <sup>+</sup> ,134.9847 [M-C <sub>5</sub> H <sub>17</sub> NO <sub>2</sub> +H] <sup>+</sup> ,427.0059[M-H] <sup>-</sup> ,201.0413[M-                                                                                                                                                                    | ↓            |
| 5   | 0.70   | 189.1255       | 189.1239       | 188.1161 | ESI <sup>+</sup> | C <sub>8</sub> H <sub>16</sub> N <sub>2</sub> O <sub>3</sub>  | N6-Acetyl-L-lysine    |                                                                                                                                                                                                                                                                                                                                                                                                                                               | ↑            |
| 6   | 0.73   | 258.1104       | 258.1106       | 257.1028 | ESI <sup>+</sup> | C <sub>8</sub> H <sub>20</sub> NO <sub>6</sub> P              | Glycerophosphocholine |                                                                                                                                                                                                                                                                                                                                                                                                                                               | ↑            |

|    |      |          |          |          |                  |                                                                |                                   |                                                                                                                                                                                                                                                                                                                                                                                                                                                                                       |   |
|----|------|----------|----------|----------|------------------|----------------------------------------------------------------|-----------------------------------|---------------------------------------------------------------------------------------------------------------------------------------------------------------------------------------------------------------------------------------------------------------------------------------------------------------------------------------------------------------------------------------------------------------------------------------------------------------------------------------|---|
| 8  | 1.11 | 130.0866 | 130.0868 | 131.0946 | ESI <sup>-</sup> | C <sub>6</sub> H <sub>13</sub> NO <sub>2</sub>                 | Leucine                           | C <sub>9</sub> H <sub>5</sub> N <sub>4</sub> O <sub>2</sub> -H] <sup>-</sup> ,146.9847[M-<br>C <sub>6</sub> H <sub>9</sub> N <sub>4</sub> O <sub>7</sub> P-H] <sup>-</sup> ,128.0348[M-<br>C <sub>5</sub> H <sub>7</sub> N <sub>3</sub> O <sub>8</sub> P <sub>2</sub> -H] <sup>-</sup><br>427.0059[M-H] <sup>-</sup> ,113.0841[M-HO-H] <sup>-</sup><br>,87.0320[M-C <sub>3</sub> H <sub>7</sub> -H] <sup>-</sup> ,85.0891[M-<br>CHO <sub>2</sub> -H] <sup>-</sup>                     | ↓ |
| 9  | 1.14 | 164.0357 | 164.0348 | 165.0426 | ESI <sup>-</sup> | C <sub>8</sub> H <sub>7</sub> NO <sub>3</sub>                  | Formylanthranilate                | 164.0357[M-H] <sup>-</sup> ,147.0320[M-HO-H] <sup>-</sup><br>,103.0184[M-CH <sub>3</sub> NO <sub>2</sub> -H] <sup>-</sup> ,91.0422<br>[M-C <sub>2</sub> HO <sub>3</sub> -H] <sup>-</sup>                                                                                                                                                                                                                                                                                              | ↓ |
| 10 | 2.54 | 136.0626 | 136.0623 | 135.0545 | ESI <sup>+</sup> | C <sub>5</sub> H <sub>5</sub> N <sub>5</sub>                   | Adenine                           | 136.0626[M+H] <sup>+</sup> ,107.0358[M-<br>CH <sub>3</sub> N+H] <sup>+</sup> ,93.0327[M-<br>CH <sub>3</sub> N <sub>2</sub> +H] <sup>+</sup> ,79.0170[M-C <sub>2</sub> H <sub>5</sub> N <sub>2</sub> +H] <sup>+</sup><br>255.0662[M+H] <sup>+</sup> ,237.0545[M-<br>H <sub>2</sub> O+H] <sup>+</sup> ,209.0596[M-<br>CH <sub>2</sub> O <sub>2</sub> +H] <sup>+</sup> ,153.0096[M-<br>C <sub>4</sub> H <sub>8</sub> NO <sub>2</sub> +H] <sup>+</sup>                                    | ↓ |
| 11 | 2.93 | 255.0662 | 255.0651 | 254.0573 | ESI <sup>+</sup> | C <sub>7</sub> H <sub>14</sub> N <sub>2</sub> O <sub>6</sub> S | 5-L-Glutamyl-taurine              | 514.2831[M+H] <sup>+</sup> ,205.0535[M-<br>C <sub>18</sub> H <sub>29</sub> NO <sub>3</sub> +H] <sup>+</sup> ,106.9439[M-<br>C <sub>25</sub> H <sub>43</sub> NO <sub>3</sub> +H] <sup>+</sup> ,79.956[M-<br>C <sub>26</sub> H <sub>42</sub> NO <sub>4</sub> +H] <sup>+</sup> ,<br>213.0147[M-H] <sup>-</sup> ,197.0215[M-O-H] <sup>-</sup><br>,116.0473[M-H <sub>2</sub> O <sub>4</sub> P-H] <sup>-</sup> ,79.9663[M-<br>C <sub>5</sub> H <sub>9</sub> O <sub>4</sub> -H] <sup>-</sup> | ↑ |
| 12 | 3.63 | 514.2831 | 514.2838 | 513.2760 | ESI <sup>+</sup> | C <sub>26</sub> H <sub>43</sub> NO <sub>7</sub> S              | Sulfolithocholyglycine            | 157.0609[M+H] <sup>+</sup> ,141.0664[M-<br>OH+H] <sup>+</sup> ,129.0426[M-                                                                                                                                                                                                                                                                                                                                                                                                            | ↓ |
| 13 | 4.02 | 213.0147 | 213.0164 | 214.0242 | ESI <sup>-</sup> | C <sub>5</sub> H <sub>11</sub> O <sub>7</sub> P                | Deoxyribose 5-phosphate           |                                                                                                                                                                                                                                                                                                                                                                                                                                                                                       | ↑ |
| 14 | 4.13 | 157.0609 | 157.0613 | 156.0535 | ESI <sup>+</sup> | C <sub>6</sub> H <sub>8</sub> N <sub>2</sub> O <sub>3</sub>    | 4-Imidazolone-5-propionic<br>acid |                                                                                                                                                                                                                                                                                                                                                                                                                                                                                       | ↓ |

|    |      |          |          |          |                  |                                                               |                           |                                                                                                                                                                                                                                                                                             |   |
|----|------|----------|----------|----------|------------------|---------------------------------------------------------------|---------------------------|---------------------------------------------------------------------------------------------------------------------------------------------------------------------------------------------------------------------------------------------------------------------------------------------|---|
| 15 | 4.28 | 464.3004 | 464.3012 | 465.3090 | ESI <sup>-</sup> | C <sub>26</sub> H <sub>43</sub> NO <sub>6</sub>               | Glycocholic acid          | CH <sub>2</sub> N+H] <sup>+</sup> ,116.0473[M-CHN <sub>2</sub> +H] <sup>+</sup><br>464.3004[M-H] <sup>-</sup> ,446.2906 [M-H <sub>2</sub> O-<br>H] <sup>-</sup> ,420.3114[M-CO <sub>2</sub> -H] <sup>-</sup><br>,288.2089[M-C <sub>7</sub> H <sub>14</sub> NO <sub>4</sub> -H] <sup>-</sup> | ↑ |
| 16 | 4.29 | 448.3064 | 448.3063 | 449.3141 | ESI <sup>-</sup> | C <sub>26</sub> H <sub>43</sub> NO <sub>5</sub>               | Glycoursodeoxycholic acid | 448.3064[M-H] <sup>-</sup> ,464.2906[M-H <sub>2</sub> O-<br>H] <sup>-</sup> ,436.3114[M-CO <sub>2</sub> -H] <sup>-</sup><br>,341.2531[M-C <sub>3</sub> H <sub>9</sub> NO <sub>5</sub> -H] <sup>-</sup>                                                                                      | ↑ |
| 17 | 4.34 | 369.2257 | 369.2277 | 370.2355 | ESI <sup>-</sup> | C <sub>20</sub> H <sub>34</sub> O <sub>6</sub>                | Thromboxane B2            | 369.2257[M-H] <sup>-</sup> ,317.1753[M-CH <sub>4</sub> -H] <sup>-</sup><br>,285.1491[M-C <sub>2</sub> H <sub>8</sub> O-H] <sup>-</sup> ,205.0865[M-<br>C <sub>8</sub> H <sub>16</sub> O-H] <sup>-</sup>                                                                                     | ↑ |
| 18 | 4.42 | 159.1015 | 159.1021 | 160.1099 | ESI <sup>-</sup> | C <sub>8</sub> H <sub>16</sub> O <sub>3</sub>                 | 3-Hydroxyoctanoic acid    | 159.1015[M-H] <sup>-</sup> ,141.0916[M-H <sub>2</sub> O-<br>H] <sup>-</sup> ,115.0395[M-C <sub>3</sub> H <sub>8</sub> -H] <sup>-</sup>                                                                                                                                                      | ↑ |
| 19 | 4.42 | 353.2306 | 353.2328 | 354.2406 | ESI <sup>-</sup> | C <sub>20</sub> H <sub>34</sub> O <sub>5</sub>                | Prostaglandin F2a         | ,113.0954[M-CH <sub>2</sub> O <sub>2</sub> -H] <sup>-</sup><br>353.2306[M-H] <sup>-</sup> ,335.2222 [M-H <sub>2</sub> O-<br>H] <sup>-</sup> ,309.2430[M-CO <sub>2</sub> -H] <sup>-</sup>                                                                                                    | ↑ |
| 20 | 4.47 | 165.0542 | 165.0552 | 166.0630 | ESI <sup>-</sup> | C <sub>9</sub> H <sub>10</sub> O <sub>3</sub>                 | Homovanillin              | ,111.0446[M-C <sub>14</sub> H <sub>26</sub> O <sub>3</sub> -H] <sup>-</sup><br>165.0542[M-H] <sup>-</sup> ,149.0239[M-CH <sub>4</sub> -H] <sup>-</sup><br>,136.0524[M-CHO-H] <sup>-</sup> ,133.0290[M-<br>CH <sub>4</sub> O-H] <sup>-</sup>                                                 | ↓ |
| 21 | 4.50 | 241.1319 | 241.1301 | 240.1222 | ESI <sup>+</sup> | C <sub>10</sub> H <sub>16</sub> N <sub>4</sub> O <sub>3</sub> | Anserine                  | 241.1319[M+H] <sup>+</sup> ,225.1113[M-<br>H <sub>2</sub> N+H] <sup>+</sup> ,155.0821[M-<br>C <sub>3</sub> H <sub>6</sub> N <sub>2</sub> O+H] <sup>+</sup> ,121.0640[M-<br>C <sub>4</sub> H <sub>10</sub> NO <sub>3</sub> +H] <sup>+</sup>                                                  | ↑ |
| 22 | 4.52 | 295.2253 | 295.2273 | 294.2195 | ESI <sup>+</sup> | C <sub>18</sub> H <sub>30</sub> O <sub>3</sub>                | 9-OxoODE                  | 295.2253[M+H] <sup>+</sup> ,279.1960[M-<br>CH <sub>4</sub> +H] <sup>+</sup> ,196.1099[M-                                                                                                                                                                                                    | ↑ |

|    |      |          |          |          |                  |                                                 |                                          |                                                                                                                                                                                                                                                                                                                                                                                                                                                                                                                                                                                                                                                                                                                                                                                                                                                                 |   |
|----|------|----------|----------|----------|------------------|-------------------------------------------------|------------------------------------------|-----------------------------------------------------------------------------------------------------------------------------------------------------------------------------------------------------------------------------------------------------------------------------------------------------------------------------------------------------------------------------------------------------------------------------------------------------------------------------------------------------------------------------------------------------------------------------------------------------------------------------------------------------------------------------------------------------------------------------------------------------------------------------------------------------------------------------------------------------------------|---|
| 23 | 4.53 | 185.1174 | 185.1178 | 186.1256 | ESI <sup>-</sup> | C <sub>10</sub> H <sub>18</sub> O <sub>3</sub>  | 3-Oxodecanoic acid                       | C <sub>7</sub> H <sub>15</sub> +H] <sup>+</sup> ,181.1229[M-C <sub>7</sub> H <sub>14</sub> O+H] <sup>+</sup><br>185.1174[M-H] <sup>-</sup> ,167.1072[M-H <sub>2</sub> O-<br>H] <sup>-</sup> ,155.0708[M-C <sub>2</sub> H <sub>6</sub> -H] <sup>-</sup><br>,113.0239[M-C <sub>5</sub> H <sub>12</sub> -H] <sup>-</sup><br>343.1254[M+H] <sup>+</sup> ,312.1057[M-<br>CH <sub>3</sub> O+H] <sup>+</sup> ,284.1107[M-<br>C <sub>2</sub> H <sub>3</sub> O <sub>2</sub> +H] <sup>+</sup> ,181.0712[M-<br>C <sub>6</sub> H <sub>10</sub> O <sub>5</sub> +H] <sup>+</sup>                                                                                                                                                                                                                                                                                              | ↓ |
| 24 | 4.54 | 343.1254 | 343.124  | 342.1162 | ESI <sup>+</sup> | C <sub>12</sub> H <sub>22</sub> O <sub>11</sub> | Epimelibiose                             | 151.0383[M-H] <sup>-</sup> ,136.0524[M-O-H] <sup>-</sup><br>,121.0290[M-CH <sub>2</sub> O-H] <sup>-</sup> ,108.0211[M-<br>C <sub>2</sub> H <sub>3</sub> O-H] <sup>-</sup><br>249.1123[M-H] <sup>-</sup> ,233.0814[M-CH <sub>4</sub> -H] <sup>-</sup><br>,205.0865[M-C <sub>2</sub> H <sub>4</sub> O-H] <sup>-</sup> ,111.0082[M-<br>C <sub>9</sub> H <sub>14</sub> O-H] <sup>-</sup><br>407.2796[M-H] <sup>-</sup> ,389.2692[M-H <sub>2</sub> O-<br>H] <sup>-</sup> ,C <sub>24</sub> H <sub>35</sub> O <sub>3</sub> [M-H <sub>4</sub> O <sub>2</sub> -H] <sup>-</sup><br>,289.2168[M-C <sub>5</sub> H <sub>10</sub> O <sub>3</sub> -H] <sup>-</sup><br>321.2061[M+H] <sup>+</sup> ,306.1831[M-<br>CH <sub>3</sub> +H] <sup>+</sup> ,265.1440[M-<br>C <sub>4</sub> H <sub>8</sub> +H] <sup>+</sup> ,251.1283[M-C <sub>5</sub> H <sub>10</sub> +H] <sup>+</sup> , | ↓ |
| 25 | 4.68 | 151.0383 | 151.0395 | 152.0473 | ESI <sup>-</sup> | C <sub>8</sub> H <sub>8</sub> O <sub>3</sub>    | 3, 4-<br>Dihydroxyphenylacetaldeh<br>yde | 318.2987[M+H] <sup>+</sup> ,303.2752[M-<br>CH <sub>3</sub> +H] <sup>+</sup> ,286.2725 M-CH <sub>3</sub> -OH+H] <sup>+</sup><br>311.2194[M-H] <sup>-</sup> ,293.2117[M-H <sub>2</sub> O-<br>H] <sup>-</sup> ,195.1385[M-C <sub>6</sub> H <sub>12</sub> O <sub>2</sub> -H] <sup>-</sup><br>,155.0708[M-C <sub>10</sub> H <sub>20</sub> O-H] <sup>-</sup>                                                                                                                                                                                                                                                                                                                                                                                                                                                                                                          | ↓ |
| 26 | 4.71 | 249.1123 | 249.1127 | 250.1205 | ESI <sup>-</sup> | C <sub>14</sub> H <sub>18</sub> O <sub>4</sub>  | Ubiquinone-1                             |                                                                                                                                                                                                                                                                                                                                                                                                                                                                                                                                                                                                                                                                                                                                                                                                                                                                 | ↑ |
| 27 | 4.72 | 407.2796 | 407.2797 | 408.2876 | ESI <sup>-</sup> | C <sub>24</sub> H <sub>40</sub> O <sub>5</sub>  | Cholic acid                              |                                                                                                                                                                                                                                                                                                                                                                                                                                                                                                                                                                                                                                                                                                                                                                                                                                                                 | ↑ |
| 28 | 4.89 | 321.2061 | 321.2066 | 320.1988 | ESI <sup>+</sup> | C <sub>19</sub> H <sub>28</sub> O <sub>4</sub>  | QH2                                      |                                                                                                                                                                                                                                                                                                                                                                                                                                                                                                                                                                                                                                                                                                                                                                                                                                                                 | ↑ |
| 29 | 5.11 | 318.2987 | 318.3008 | 318.2987 | ESI <sup>+</sup> | C <sub>18</sub> H <sub>39</sub> NO <sub>3</sub> | Phytosphingosine                         |                                                                                                                                                                                                                                                                                                                                                                                                                                                                                                                                                                                                                                                                                                                                                                                                                                                                 | ↓ |
| 30 | 5.35 | 311.2194 | 311.2222 | 312.2301 | ESI <sup>-</sup> | C <sub>18</sub> H <sub>32</sub> O <sub>4</sub>  | 8(R)-Hydroperoxylinoleic<br>acid         |                                                                                                                                                                                                                                                                                                                                                                                                                                                                                                                                                                                                                                                                                                                                                                                                                                                                 | ↑ |

|    |      |          |          |          |                  |                                                 |                        |                                                                                                                                                                                |   |
|----|------|----------|----------|----------|------------------|-------------------------------------------------|------------------------|--------------------------------------------------------------------------------------------------------------------------------------------------------------------------------|---|
| 31 | 5.80 | 311.2219 | 311.2222 | 312.2301 | ESI <sup>-</sup> | C <sub>18</sub> H <sub>32</sub> O <sub>4</sub>  | 9(S)-HPODE             | 311.2219[M-H]-,293.2117[M-H <sub>2</sub> O-H]-,267.1596[M-C <sub>3</sub> H <sub>8</sub> -H]-,179.1436[M-C <sub>6</sub> H <sub>12</sub> O <sub>3</sub> -H]-                     | ↑ |
| 32 | 5.80 | 333.2039 | 333.2066 | 334.2144 | ESI <sup>-</sup> | C <sub>20</sub> H <sub>30</sub> O <sub>4</sub>  | Prostaglandin J2       | 333.2039[M-H]-,317.1753[M-CH <sub>4</sub> -H]-,285.1491[M-C <sub>2</sub> H <sub>6</sub> O-H]-,273.1855[M-C <sub>2</sub> H <sub>4</sub> O <sub>2</sub> -H]-                     | ↑ |
| 33 | 5.84 | 269.2111 | 269.2117 | 270.2195 | ESI <sup>-</sup> | C <sub>16</sub> H <sub>30</sub> O <sub>3</sub>  | 3-Oxohexadecanoic acid | 269.2111[M-H]-,253.1804[M-CH <sub>4</sub> -H]-,167.1436[M-C <sub>5</sub> H <sub>10</sub> O <sub>2</sub> -H]-                                                                   | ↓ |
| 34 | 5.89 | 303.2319 | 303.2324 | 304.2402 | ESI <sup>-</sup> | C <sub>20</sub> H <sub>32</sub> O <sub>2</sub>  | Arachidonic acid       | 100.0160[M-C <sub>12</sub> H <sub>25</sub> -H]-,303.2319[M-H]-,286.2297[M-HO-H]-,273.1855[M-C <sub>2</sub> H <sub>6</sub> -H]-,151.0759[M-C <sub>11</sub> H <sub>20</sub> -H]- | ↑ |
| 35 | 5.94 | 311.2214 | 311.2222 | 312.2301 | ESI <sup>-</sup> | C <sub>18</sub> H <sub>32</sub> O <sub>4</sub>  | 13(S)-HPODE            | 311.2214[M-H]-,279.1960[M-CH <sub>4</sub> -H]-,155.1072[M-C <sub>9</sub> H <sub>16</sub> O-H]-,127.0759[M-C <sub>11</sub> H <sub>20</sub> O-H]-                                | ↑ |
| 36 | 5.96 | 333.2035 | 333.2066 | 334.2144 | ESI <sup>-</sup> | C <sub>20</sub> H <sub>30</sub> O <sub>4</sub>  | Prostaglandin A2       | 333.2035[M-H]-,317.1753[M-CH <sub>4</sub> -H]-,299.1647[M-CH <sub>6</sub> O-H]-,231.1021[M-C <sub>6</sub> H <sub>14</sub> O-H]-                                                | ↑ |
| 37 | 6.39 | 295.2269 | 295.2273 | 296.2351 | ESI <sup>-</sup> | C <sub>18</sub> H <sub>32</sub> O <sub>3</sub>  | 12, 13-EpOME           | 295.2269[M-H]-,279.1960[M-CH <sub>4</sub> -H]-,155.1072[M-C <sub>9</sub> H <sub>16</sub> O-H]-,141.0916[M-C <sub>10</sub> H <sub>18</sub> O-H]-                                | ↓ |
| 38 | 7.18 | 376.3205 | 376.3216 | 375.3137 | ESI <sup>+</sup> | C <sub>24</sub> H <sub>41</sub> NO <sub>2</sub> | Adrenoyl ethanolamide  | 376.3205[M+H]+,264.1964[M-C <sub>8</sub> H <sub>16</sub> +H]+,177.1643[M-C <sub>11</sub> H <sub>21</sub> NO <sub>2</sub> +H]+,141.1154[M-C <sub>16</sub> H <sub>27</sub> O+H]+ | ↓ |

|    |      |          |          |          |                  |                                                  |                               |                                                                                                                                                                                                                                                                                                                                                                                                                                                                                                                                                                                                                                                                                                                                                                                                                                                                                                                                                                                                                                                                                                                                                                                                                                                                                                                                                                                                                                                                                                                                                                                                                                                                                                                                              |   |
|----|------|----------|----------|----------|------------------|--------------------------------------------------|-------------------------------|----------------------------------------------------------------------------------------------------------------------------------------------------------------------------------------------------------------------------------------------------------------------------------------------------------------------------------------------------------------------------------------------------------------------------------------------------------------------------------------------------------------------------------------------------------------------------------------------------------------------------------------------------------------------------------------------------------------------------------------------------------------------------------------------------------------------------------------------------------------------------------------------------------------------------------------------------------------------------------------------------------------------------------------------------------------------------------------------------------------------------------------------------------------------------------------------------------------------------------------------------------------------------------------------------------------------------------------------------------------------------------------------------------------------------------------------------------------------------------------------------------------------------------------------------------------------------------------------------------------------------------------------------------------------------------------------------------------------------------------------|---|
| 39 | 7.33 | 337.2356 | 337.2379 | 336.2301 | ESI <sup>+</sup> | C <sub>20</sub> H <sub>32</sub> O <sub>4</sub>   | 11H-14, 15-EETA               | 337.2356[M+H] <sup>+</sup> ,335.2222[M-H <sub>2</sub> O+H] <sup>+</sup> ,309.2430[M-CO <sub>2</sub> +H] <sup>+</sup> ,291.1960[M-C <sub>2</sub> H <sub>6</sub> O <sub>2</sub> +H] <sup>+</sup><br>300.2892[M+H] <sup>+</sup> ,282.2797[M-H <sub>2</sub> O+H] <sup>+</sup> ,183.1623[M-C <sub>7</sub> H <sub>17</sub> O+H] <sup>+</sup> ,155.1310[M-C <sub>9</sub> H <sub>21</sub> O+H] <sup>+</sup><br>277.2166[M-H] <sup>-</sup> ,259.2062[M-H <sub>2</sub> O-H] <sup>-</sup> ,233.1542[M-C <sub>3</sub> H <sub>8</sub> -H] <sup>-</sup><br>,189.1643[M-C <sub>4</sub> H <sub>8</sub> O <sub>2</sub> -H] <sup>-</sup><br>256.2641[M+H] <sup>+</sup> ,238.2297[M-H <sub>3</sub> N+H] <sup>+</sup> ,167.1436[M-C <sub>5</sub> H <sub>15</sub> N+H] <sup>+</sup> ,116.1075[M-C <sub>10</sub> H <sub>20</sub> +H] <sup>+</sup><br>282.2798[M+H] <sup>+</sup> ,265.2531[M-H <sub>3</sub> N+H] <sup>+</sup> ,240.2327[M-C <sub>3</sub> H <sub>6</sub> +H] <sup>+</sup> ,114.1408[M-C <sub>10</sub> H <sub>18</sub> NO+H] <sup>+</sup><br>279.2325[M-H] <sup>-</sup> ,261.2218[M-H <sub>2</sub> O-H] <sup>-</sup> ,233.2269[M-CH <sub>2</sub> O <sub>2</sub> -H] <sup>-</sup><br>,141.0916[M-C <sub>10</sub> H <sub>18</sub> -H] <sup>-</sup><br>465.3033[M-H] <sup>-</sup> ,449.2726[M-CH <sub>4</sub> -H] <sup>-</sup><br>,381.2100[M-C <sub>6</sub> H <sub>12</sub> -H] <sup>-</sup> ,255.1749[M-C <sub>9</sub> H <sub>22</sub> O <sub>3</sub> S-H] <sup>-</sup><br>417.3398[M-H] <sup>-</sup> ,351.3052[M-CH <sub>6</sub> O <sub>3</sub> -H] <sup>-</sup> ,349.2895[M-CH <sub>8</sub> O <sub>3</sub> -H] <sup>-</sup><br>,283.2062[M-C <sub>7</sub> H <sub>18</sub> O <sub>2</sub> -H] <sup>-</sup><br>393.2974[M+H] <sup>+</sup> ,329.2844[M- | ↑ |
| 40 | 7.40 | 300.2892 | 300.2903 | 299.2824 | ESI <sup>+</sup> | C <sub>18</sub> H <sub>37</sub> NO <sub>2</sub>  | Sphingosine                   |                                                                                                                                                                                                                                                                                                                                                                                                                                                                                                                                                                                                                                                                                                                                                                                                                                                                                                                                                                                                                                                                                                                                                                                                                                                                                                                                                                                                                                                                                                                                                                                                                                                                                                                                              | ↓ |
| 41 | 7.47 | 277.2166 | 277.2168 | 278.2246 | ESI <sup>-</sup> | C <sub>18</sub> H <sub>30</sub> O <sub>2</sub>   | Gamma-Linolenic acid          |                                                                                                                                                                                                                                                                                                                                                                                                                                                                                                                                                                                                                                                                                                                                                                                                                                                                                                                                                                                                                                                                                                                                                                                                                                                                                                                                                                                                                                                                                                                                                                                                                                                                                                                                              | ↓ |
| 42 | 7.74 | 256.2641 | 256.264  | 255.2562 | ESI <sup>+</sup> | C <sub>16</sub> H <sub>33</sub> NO               | Palmitic amide                |                                                                                                                                                                                                                                                                                                                                                                                                                                                                                                                                                                                                                                                                                                                                                                                                                                                                                                                                                                                                                                                                                                                                                                                                                                                                                                                                                                                                                                                                                                                                                                                                                                                                                                                                              | ↓ |
| 43 | 7.92 | 282.2798 | 282.2797 | 281.2719 | ESI <sup>+</sup> | C <sub>18</sub> H <sub>35</sub> NO               | Oleamide                      |                                                                                                                                                                                                                                                                                                                                                                                                                                                                                                                                                                                                                                                                                                                                                                                                                                                                                                                                                                                                                                                                                                                                                                                                                                                                                                                                                                                                                                                                                                                                                                                                                                                                                                                                              | ↓ |
| 44 | 7.97 | 279.2325 | 279.2324 | 280.2402 | ESI <sup>-</sup> | C <sub>18</sub> H <sub>32</sub> O <sub>2</sub>   | Linoleic acid                 |                                                                                                                                                                                                                                                                                                                                                                                                                                                                                                                                                                                                                                                                                                                                                                                                                                                                                                                                                                                                                                                                                                                                                                                                                                                                                                                                                                                                                                                                                                                                                                                                                                                                                                                                              | ↓ |
| 45 | 8.69 | 465.3033 | 465.3039 | 466.3117 | ESI <sup>-</sup> | C <sub>27</sub> H <sub>46</sub> O <sub>4</sub> S | Cholesterol sulfate           |                                                                                                                                                                                                                                                                                                                                                                                                                                                                                                                                                                                                                                                                                                                                                                                                                                                                                                                                                                                                                                                                                                                                                                                                                                                                                                                                                                                                                                                                                                                                                                                                                                                                                                                                              | ↑ |
| 46 | 9.10 | 417.3398 | 417.3369 | 418.3447 | ESI <sup>-</sup> | C <sub>27</sub> H <sub>46</sub> O <sub>3</sub>   | 17a, 20a-Dihydroxycholesterol |                                                                                                                                                                                                                                                                                                                                                                                                                                                                                                                                                                                                                                                                                                                                                                                                                                                                                                                                                                                                                                                                                                                                                                                                                                                                                                                                                                                                                                                                                                                                                                                                                                                                                                                                              | ↑ |

|    |           |          |          |          |                  |                                                    |           |                                                                                                                                                                                                                                                                                                                                                                                                                                                                                  |   |
|----|-----------|----------|----------|----------|------------------|----------------------------------------------------|-----------|----------------------------------------------------------------------------------------------------------------------------------------------------------------------------------------------------------------------------------------------------------------------------------------------------------------------------------------------------------------------------------------------------------------------------------------------------------------------------------|---|
| 48 | 10.9<br>4 | 864.6223 | 864.6235 | 863.6156 | ESI <sup>+</sup> | C <sub>46</sub> H <sub>89</sub> NO <sub>11</sub> S | Sulfatide | CH <sub>4</sub> O <sub>3</sub> +H] <sup>+</sup> ,149.0966[M-<br>C <sub>14</sub> H <sub>28</sub> O <sub>3</sub> +H] <sup>+</sup> ,121.1017 [M-<br>C <sub>15</sub> H <sub>28</sub> O <sub>4</sub> +H] <sup>+</sup><br>864.6223[M+H] <sup>+</sup> ,662.3938[M-<br>C <sub>3</sub> H <sub>8</sub> O+H] <sup>+</sup> ,283.2147[M-<br>C <sub>20</sub> H <sub>39</sub> O <sub>8</sub> S+H] <sup>+</sup> ,171.0895[M-<br>C <sub>28</sub> H <sub>55</sub> O <sub>8</sub> S+H] <sup>+</sup> | ↑ |
|----|-----------|----------|----------|----------|------------------|----------------------------------------------------|-----------|----------------------------------------------------------------------------------------------------------------------------------------------------------------------------------------------------------------------------------------------------------------------------------------------------------------------------------------------------------------------------------------------------------------------------------------------------------------------------------|---|

---

↑ or ↓ represents the level of compound in serum that was increased or decreased in the AD model group compared with the control group, respectively.
